# Supplementary material for: The effect of chain length in terminal groups on the mesomorphic behavior of novel (−)-menthol-based chiral liquid crystal compounds with a blue phase
Source: Royal Society of Chemistry journal article supplement (doi:10.1039/c7nj00099e), 2017-01-01
Supplement: c7nj00099e1.pdf [file c7nj00099e1.pdf]

## Supporting Information

### Effect of chain length in the terminal group on mesomorphic behavior of novel (-)-menthol-based chiral liquid crystal compounds with blue phase

Congcong Luo, Yinggang Jia\*, Bingfeng Sun, and Fanbao Meng

#### 3.2 Mesomorphic properties

##### (iv) Comparison of compound O, series I and series II.

The free energy per unit length of a single disclination line  $F$  for a lattice of defects is expressed by four terms<sup>7</sup>:

$$F = \alpha(T_{iso} - T)\pi R^2 + 2\sigma\pi R + \frac{1}{4}\pi K \ln(R_{max} / R) - \pi(K_{22} + K_{24}) \quad (S1)$$

Herein,  $\alpha$  is the constant including the Boltzmann constant,  $T_{iso}$  is the clearing point,  $T$  is a temperature near  $T_{iso}$ ,  $K$  is the Oseen-Frank elastic constant concerning the splay, twist and bend distortions of the director,  $\sigma$  is the surface tension of the disclination core,  $R$  is the disclination core radius,  $R_{max}$  is the cut-off radius of the disclination core, and  $K_{22}$  and  $K_{24}$  are the elastic constants of the twist and saddle-splay distortions, respectively.
